# Supplementary material for: Tumors mimic the niche to inhibit neighboring stem cell differentiation
Source: eLife. 2026 May 15;14:RP108910. doi: 10.7554/eLife.108910 (PMC13179058; doi:10.7554/eLife.108910)
Supplement: Source data 2. [file elife-108910-data2.xlsx]

## Sheet: Raw quantification data
Figure 1											Figure 1-figure supplement 2				Figure 1-figure supplement 3						Figure 2							Figure 3									Figure 4												Figure 5
Figure 1J						Figure 1K					Figure 1-figure supplement 2B				Figure 1-figure supplement 3B						Figure 2C			Figure 2H				Figure 3D			Figure 3E			Figure 3H			Figure 4E				Figure 4F				Figure 4J				Figure 5B, D
bamΔ86		SGC numbers	germline cyst numbers	total	SGC%	bamΔ86		SGC numbers	germarial numbers	SGCs per germarium	clone size (cell number)	1-day	7-day	14-day	bamΔ86		SGC numbers	germline cyst numbers	total	SGC%		bamP-GFP negative	bamP-GFP positive		percentage of SGCs to (SGCs + germline cysts)				Dad-lacZ positive	Dad-lacZ negative		GSCs	SGCs		GSCs	SGCs			GFP+/+ RFP-/- (control: wild-type punt: punt-/- med: med-/-)	GFP+/- RFP+/- (control: bam+/- punt: punt+/- bam+/- med: med+/- bam+/-)			SGCs	germline cysts		percentage of SGCs to (SGCs + germline cysts)
	1-day	93	24	117	0.79		14-day	172	107	1.61		13	24	30		nos>FLP/FRT	172	41	213	0.807512	GSCs	100% (153/153)	0% (0/153)	without hs-bam (12D)	73% (151/206)	72% (100/139)	76% (118/155)	GSCs	100% (122/122)	0% (0/122)	relative Dad-lacZ intensity (measured intensity/averaged intensity in GSCs)	0.952527	0.487015	percentage of BrdU+ to total	7.8% (104/1337)	4.5% (47/1034)					GFP+/+ RFP-/-	wild-type	67% (160/239)	33% (79/239)	control	76% (109/144)	77% (121/157)	77% (96/125)	relative dpp expression (in situ-HCR) (measured intensity/average intensity in WT TF+cap cells)
		96	23	119	0.81			202	136	1.49		11	18	17			202	49	251	0.804781	CBs	2% (2/106)	98% (104/106)	with hs-bam (12D)	66% (86/130)	71% (84/118)	74% (98/132)	SGCs	73% (78/107)	27% (29/107)		0.829697	0.42422									punt-/-	48% (88/182)	52% (94/182)	mad-/-	8% (11/138)	6% (6/104)	11% (14/126)
		111	30	141	0.79			169	114	1.48		14	20	22			169	46	215	0.786047	SGCs	74% (98/132)	26% (34/132)	without hs-bam (14D)	73% (127/173)	75% (117/157)	80% (134/168)					1.20758	0.379698									med-/-	22% (32/147)	78% (115/147)
	7-day	128	37	165	0.78							11	18	30		hs>FLP/FRT	84	25	109	0.770642				with hs-bam (14D)	71% (105/148)	75% (92/123)	71% (124/174)					0.88081	0.404533				SGC composition	control	68% (160/234)	32% (74/234)
		104	29	133	0.78	bgcn1		SGC numbers	germarial numbers	SGCs per germarium		14	17	31			97	27	124	0.782258				without hs-bam (12D + 2D hs)	71% (117/165)	75% (118/157)	78% (100/128)					1.31375	0.385846					punt	18% (88/485)	82% (397/485)
		115	24	139	0.83		14-day	140	110	1.27		7	19	32			86	25	111	0.774775				with hs-bam (12D + 2D hs)	11% (14/130)	17% (22/129)	21% (33/155)					0.875292	0.484956					med	11% (32/285)	89% (253/285)
	14-day	172	41	213	0.81			141	106	1.33		15	15	23																		1.11413	0.593674
		202	49	251	0.8			141	115	1.23		10	25	18																		0.720736	0.528177
		169	46	215	0.79							17	14	22																		0.77804	0.485771
												8	16	25																		0.757752	0.692098
bamBG		SGC numbers	germline cyst numbers	total	SGC%							8	11	20																		1.3242	0.552354
	1-day	87	21	108	0.81							5	17	18																		1.08998	0.600623
		108	33	141	0.77							11	16	24																		0.930451	0.622383
		112	25	137	0.82							12	16	21																		0.885028	0.51438
	7-day	96	25	121	0.79							5	18	18																		0.986397	0.367245
		91	21	112	0.81							8	10	22																		0.905059	0.499125																relative gbb expression (in situ-HCR) (measured intensity/average intensity in WT TF+cap cells)
		102	29	131	0.78							10	16	18																		0.812411	0.523945
	14-day	120	29	149	0.81							3	15	19																		1.1301	0.252308
		85	20	105	0.81							11	14	31																		0.607242	0.357008
		95	27	122	0.78							9	18	25																		0.585382
												11	17	31																		1.08489
bgcn1		SGC numbers	germline cyst numbers	total	SGC%							10	18	22																		0.979034
	1-day	97	38	135	0.72							9	20	20																		1.59827
		98	44	142	0.69							11	17	28																		1.0076
		71	34	105	0.68							5	13	24																		1.08937
	7-day	85	39	124	0.69							12	17	21																		0.882812
		80	39	119	0.67							9	23	16																		0.884499
		76	38	114	0.67							11	15	24																		1.08695
	14-day	140	60	200	0.7							7	17	24																		0.748087
		141	64	205	0.69							13	18	21																		1.65117
		141	72	213	0.66							13	14	21																		1.39436
												7	28	21																		0.906374
												4	17	18
												14	18	26
												11	16	21
												7	19	19
												13		24
												8		24
												6		27
												5		29
												9
[truncated: 42 more columns]
